# Supplementary material for: Diel transcriptional response of a California Current plankton microbiome to light, low iron, and enduring viral infection
Source: PubMed Central journal article supplement (PMC6794264; doi:10.1038/s41396-019-0472-2), 2019-07-18
Supplement: 41396_2019_472_MOESM3_ESM.pdf [file 41396_2019_472_MOESM3_ESM.pdf]

## Supplementary File 3

# Description of Supplementary Datasets

**Supplementary Data 1:** Summary statistics for assembly and taxonomic annotation of large (**sheet A**) and small (**sheet B**) size class metatranscriptomes

**Supplementary Data 2:** Summary statistics for large fraction rRNA amplicon analysis pipeline by library (**sheet A**) and overall (**sheet B**)

**Supplementary Data 3:** 18S rRNA amplicon data for the large size class

**Sheet A:** Raw count data for each unique 18S sequence

**Sheet B:** Library (time point) normalized count data for each unique 18S sequence

**Sheet C-F:** Library (time point) normalized count data summarized by species, family, order, and phylum, respectively

**Supplementary Data 4:** Non-plastid 16S rRNA amplicon data for the large size class

**Sheet A:** Raw count data for each unique 16S sequence

**Sheet B:** Library (time point) normalized count data for each unique 16S sequence

**Sheet C-F:** Library (time point) normalized count data summarized by species, family, order, and phylum, respectively

**Supplementary Data 5:** 16S rRNA plastid amplicon data for the large size class

**Sheet A:** Raw count data for each unique 16S sequence

**Sheet B:** Library (time point) normalized count data for each unique 16S sequence

**Sheet C-F:** Library (time point) normalized count data summarized by species, family, order, and phylum, respectively

**Supplementary Data 6:** Raw count data for large fraction *ab initio* nuclear and organellar ORFs with taxonomic annotations, functional annotations, and HRA results. (Note- large file, best viewed in RStudio or similar rather than excel)

**Supplementary Data 7:** Raw count data resulting from nucleotide space mapping of large and small size class metatranscriptome reads to chosen references. (Note- large file, best viewed in RStudio or similar rather than excel)

**Supplementary Data 8:** Raw count data for clusters of *ab initio* and reference ORFs (as determined by hierarchical clustering of amino acid sequences). Cluster statistics and consensus annotations are included. Clusters differentially expressed between large and small fraction (EdgeR FDR  $p < 0.05$ ) are also noted. (Note- large file, best viewed in RStudio or similar rather than excel)

**Supplementary Data 9:** Differential expression of taxa groups between large and small fraction (EdgeR FDR  $p < 0.05$ ) using *ab initio* ORFs.

**Sheet A:** Using the 15 taxa groups shown in main text figures for ease of viewing

**Sheet B:** Using 26 taxa groups for a higher resolution picture

**Supplementary Data 10:** Differential expression of genera between large and small fraction (EdgeR FDR  $p < 0.05$ ) using *ab initio* ORFs.

**Supplementary Data 11:** Descriptions of column names for previous supplementary data files

**Supplementary Data 12:** Environmental metadata

**Sheet A:** ESP drift track coordinates and velocity

**Sheet B:** Bottle data (chlorophyll and nutrients) as measured from shipboard CTD/niskin rosette deployments

**Sheet C:** Pressure, temperature, salinity, corrected chlorophyll, and percent transmission as measured from shipboard CTD/niskin rosette deployments

**Sheet D:** Surface photosynthetically active radiation (PAR) as measured from the surface drifter

**Sheet E:** Previous iron measurements in the region of the ESP drift
